# Supplementary material
Source: Springer Nature journal article supplement (https://www.springermedizin.de/resource/supplementary/13063_2009_428_MOESM2_ESM.pdf/9618192)
Supplement: MOESM2 [file 9618192]

**Potentially Relevant Abstracts from  
MEDLINE, EMBASE and Cochrane Search  
(1187 Abstracts)  
Grey Literature  
(1873 Grey Publications)**

**Excluded with Reasons  
(1120 Abstracts)  
(1872 Grey Publications)**  
Trial protocol papers, Off topic  
review papers, Letters,  
Editorials, etc.

**Full Text Papers Retrieved  
for Detailed Review.  
(67 Papers)**

**Excluded with Reasons  
(15 papers)**  
**11** Main focus on improving recruitment rate  
**4** Review papers, not on topic

**Papers Reporting Any Type of  
Protocol Violation  
(52 Papers)**

**Excluded with Reasons  
(52 papers)**  
**23** Did not specify type of protocol violation  
**17** Main focus on drug delivery errors  
**10** Main focus on patient compliance  
**2** Did not conduct any evaluation

**Included  
0 Primary Papers  
1 Grey Publication**
